# Supplementary material for: Haplotypes in the promoter region of the CIDEC gene associated with growth traits in Nanyang cattle
Source: PubMed Central journal article supplement (PMC4648405; doi:10.1038/srep12075), 2015-07-20
Supplement: srep12075-s1.pdf [file srep12075-s1.pdf]

# **Haplotypes in the promoter region of the CIDEA gene associated with growth traits in Nanyang cattle**

Jing Wang<sup>1,2</sup>, Liu-shuai Hua<sup>2</sup>, Hong Pan<sup>1</sup>, Liang-zhi Zhang<sup>1</sup>, Ming-xun Li<sup>1</sup>, Yong-zhen Huang<sup>1</sup>,

Zhuan-jian Li<sup>1</sup>, Xian-yong Lan<sup>1</sup>, Chu-zhao Lei<sup>1</sup> Cong-jun Li<sup>3</sup> and Hong Chen<sup>1\*</sup>

Supplementary Table S1. Description of the SNPs in the bovine *CIDE*C gene.

| Number | Variant type | GenBank acc. No. | DPS (nt) |
|--------|--------------|------------------|----------|
| 1      | g.-974 C>T   | ss528106580      | 0        |
| 2      | g.-956 G>A   | ss528106583      | 20       |
| 3      | g.-841 T>C   | ss528106585      | 109      |
| 4      | g.-763 C>T   | ss528106587      | 77       |
| 5      | g.-762 C>T   | ss528106589      | 0        |
| 6      | g.-727 C>T   | ss528106591      | 24       |
| 7      | g.-714 T>C   | ss528106592      | 22       |
| 8      | g.-643 T>G   | ss528106594      | 70       |
| 9      | g.-546 T>C   | ss528106596      | 96       |
| 10     | g.-501 G>A   | ss528106597      | 44       |

Note: DPS, distance from previous sequence variant.

Supplementary Table S2. Genotype and allele frequencies and diversity parameters for the *CIDEA* gene in

Nanyang cattle

| Loci       | Genotype number<br>and frequencies |                |                | Allelic<br>frequencies |       | Genetic diversity parameters |       |       |       |
|------------|------------------------------------|----------------|----------------|------------------------|-------|------------------------------|-------|-------|-------|
|            | <i>Ho</i>                          | <i>He</i>      | <i>Ne</i>      | PIC                    |       |                              |       |       |       |
| g.-974 C>T | CC                                 | CT             | TT             | C                      | T     | 0.500                        | 0.500 | 1.999 | 0.375 |
|            | 66<br>(0.310)                      | 86<br>(0.405)  | 61<br>(0.286)  | 0.512                  | 0.488 |                              |       |       |       |
| g.-956 G>A | AA                                 | AG             | GG             | A                      | G     | 0.602                        | 0.398 | 1.660 | 0.319 |
|            | 10<br>(0.048)                      | 96<br>(0.452)  | 107<br>(0.500) | 0.274                  | 0.726 |                              |       |       |       |
| g.-841 T>C | CC                                 | CT             | TT             | C                      | T     | 0.602                        | 0.398 | 1.660 | 0.319 |
|            | 10<br>(0.048)                      | 96<br>(0.452)  | 107<br>(0.500) | 0.274                  | 0.726 |                              |       |       |       |
| g.-763 C>T | CC                                 | CT             | TT             | C                      | T     | 0.602                        | 0.398 | 1.660 | 0.319 |
|            | 107<br>(0.500)                     | 96<br>(0.452)  | 10<br>(0.048)  | 0.726                  | 0.274 |                              |       |       |       |
| g.-762 C>T | CC                                 | CT             | TT             | C                      | T     | 0.738                        | 0.262 | 1.354 | 0.227 |
|            | 152<br>(0.714)                     | 56<br>(0.262)  | 5<br>(0.024)   | 0.845                  | 0.155 |                              |       |       |       |
| g.-727 C>T | CC                                 | CT             | TT             | C                      | T     | 0.582                        | 0.418 | 1.718 | 0.331 |
|            | 96<br>(0.452)                      | 107<br>(0.500) | 10<br>(0.048)  | 0.702                  | 0.298 |                              |       |       |       |
| g.-714 T>C | CC                                 | CT             | TT             | C                      | T     | 0.976                        | 0.024 | 1.024 | 0.023 |
|            | 0<br>(0.000)                       | 5<br>(0.024)   | 208<br>(0.976) | 0.012                  | 0.988 |                              |       |       |       |
| g.-643 T>G | GG                                 | GT             | TT             | G                      | T     | 0.677                        | 0.323 | 1.477 | 0.271 |
|            | 137<br>(0.643)                     | 66<br>(0.310)  | 10<br>(0.048)  | 0.798                  | 0.202 |                              |       |       |       |
| g.-546 T>C | CC                                 | CT             | TT             | C                      | T     | 0.592                        | 0.408 | 1.690 | 0.325 |
|            | 10<br>(0.048)                      | 101<br>(0.476) | 101<br>(0.476) | 0.286                  | 0.714 |                              |       |       |       |
| g.-501 G>A | AA                                 | AG             | GG             | A                      | G     | 0.677                        | 0.323 | 1.477 | 0.271 |
|            | 10<br>(0.048)                      | 66<br>(0.310)  | 137<br>(0.643) | 0.202                  | 0.798 |                              |       |       |       |

Note: *Ho*: gene homozygosity, *He*: heterozygosity, *Ne*: effective allele numbers, *PIC*: polymorphism information content.

Supplementary Table S3. The estimated values of linkage equilibrium analysis between the ten *CIDEC* SNPs in Nanyang cattle

| <i>D'</i>          | <i>g</i> .-974 | <i>g</i> .-956 | <i>g</i> .-841 | <i>g</i> .-763 | <i>g</i> .-762 | <i>g</i> .-727 | <i>g</i> .-714 | <i>g</i> .-643 | <i>g</i> .-546 | <i>g</i> .-501        |
|--------------------|----------------|----------------|----------------|----------------|----------------|----------------|----------------|----------------|----------------|-----------------------|
|                    | C>T            | G>A            | T>C            | C>T            | C>T            | C>T            | T>C            | T>G            | T>C            | G>A                   |
| <i>g</i> .-974 C>T | -              | 1.000          | 1.000          | 1.000          | 1.000          | 0.895          | 1.000          | 1.000          | 1.000          | 1.000                 |
| <i>g</i> .-956 G>A | <u>0.359</u>   | -              | 1.000          | 1.000          | 1.000          | 1.000          | 1.000          | 0.998          | 1.000          | 0.998                 |
| <i>g</i> .-841 T>C | <u>0.359</u>   | 1.000          | -              | 1.000          | 1.000          | 1.000          | 1.000          | 0.998          | 1.000          | 0.998                 |
| <i>g</i> .-763 C>T | <u>0.359</u>   | 1.000          | 1.000          | -              | 1.000          | 1.000          | 1.000          | 0.998          | 1.000          | 0.998                 |
| <i>g</i> .-762 C>T | 0.174          | <u>0.486</u>   | <u>0.486</u>   | <u>0.486</u>   | -              | 1.000          | 1.000          | 0.954          | 1.000          | 0.954                 |
| <i>g</i> .-727 C>T | 0.324          | <u>0.890</u>   | <u>0.890</u>   | <u>0.890</u>   | <u>0.432</u>   | -              | 1.000          | 0.998          | 1.000          | 0.998                 |
| <i>g</i> .-714 T>C | 0.013          | 0.005          | 0.005          | 0.005          | 0.002          | 0.005          | -              | 1              | 1.000          | 1.000                 |
| <i>g</i> .-643 T>G | 0.242          | 0.095          | 0.095          | 0.095          | 0.042          | 0.107          | 0.003          | -              | 0.998          | 1.000                 |
| <i>g</i> .-546 T>C | <u>0.381</u>   | <u>0.943</u>   | <u>0.943</u>   | <u>0.943</u>   | <u>0.458</u>   | <u>0.944</u>   | 0.005          | 0.101          | -              | 0.998                 |
| <i>g</i> .-501 G>A | 0.242          | 0.095          | 0.095          | 0.095          | 0.042          | 0.107          | 0.003          | 1.000          | 0.101          | <i>r</i> <sup>2</sup> |

Note: The correlation coefficients *D'* and *r*<sup>2</sup> between ten SNPs were shown in the above and below diagonal of this table, respectively. The *r*<sup>2</sup> value that equals 1.000 is colored, and bigger than 0.33 is underlined.

Supplementary Table S4. Primers for PCR amplification of the bovine *CIDE*C gene

| Loci | Position*   | Sequence<br>(5'-3')                                | AT<br>(°C) | SAF<br>(bp) | Note                                  |
|------|-------------|----------------------------------------------------|------------|-------------|---------------------------------------|
| P1   | 2473-3461   | AGGAGAACATTTTCAGGGTG<br>GCAGTGGAAGTTGGGAG          | 55         | 989         | 5'flanking region<br>(SNP detection)  |
| P2   | 3480-4101   | TTTCTAATCAGGGAAC TAAG<br>ACCAAAGGACTACAGGGA        | 65         | 622         | Exon 1<br>(SNP detection)             |
| P3   | 4230-4903   | TTCTGTCACTGGCTACTTCTCA<br>GGAGGGTGGCAGTACATTATCA   | 58         | 674         | Exon 2<br>(SNP detection)             |
| P4   | 7284-8223   | CATCACTTACCTTATTCTCCAG<br>GACAGTTAGTTCATCCCTTCCA   | 56         | 940         | Exon 3,4<br>(SNP detection)           |
| P5   | 10851-11479 | TTCTTGGTGT TTTTGACCCTAATGCC<br>AAAGAACAGAAGCACAGA  | 59         | 629         | Exon 5<br>(SNP detection)             |
| P6   | 2466-3786   | TGGGAACAGGAGAACATTTTCAG<br>ACAAGATGCCAAGGTGACTTACA | 55         | 1321        | 5'flanking region<br>(DNA sequencing) |

Note: AT: annealing temperature; SAF, size of amplification fragment.

\*The primers were designed based on the sequence of bovine *CIDE*C gene, the GenBank number is AC\_000179.1, its GeneID is 534607. To including the 5' flanking region, we including 5000bp before the translation start site, so in our sequence the position of the translation start site is 5001.

P1-P5 were used for SNP detection by DNA pool sequencing, P6 was used to detect the 10 SNPs in the 5' flanking region.
